# Supplementary material
Source: PubMed Central journal article supplement (PMC2682603)
Supplement: E08-11-1150_1.pdf [file E08-11-1150_1.pdf]

**Supplementary Figure S1. *slb* mutants delay bipolar spindle formation and elongation.** Logarithmically growing cultures of wild-type, *slb1* (ySP4383) and *slb2* (ySP4419) strains were arrested in G1 by  $\alpha$ -factor at 25°C and then released at time 0 into YPD medium at 37°C. At the indicated time points samples were taken for (A) FACS analysis of DNA content and (B) to follow kinetics of budding, nuclear division and mitotic spindle assembly/elongation. (C) Micrographs were taken 90' after release.

**Supplementary Figure S2. *CLB2* overexpression partially suppresses the effects of SAC inactivation on SPB separation in *stu1-5* cells.** *stu1-5* (ySP6892), *stu1-5 mad2Δ* (ySP6625), *stu1-5 mad2Δ GAL1-CLB2Δdb* (ySP7653) cells were grown in YEPR, arrested in G1 with  $\alpha$  factor at 25°C and released in YEPRG at 37°C. Samples were collected at the indicated times to follow kinetics of budding, SPB separation and mitotic spindle formation. Distances between SPBs were measured 120' after release.

**A**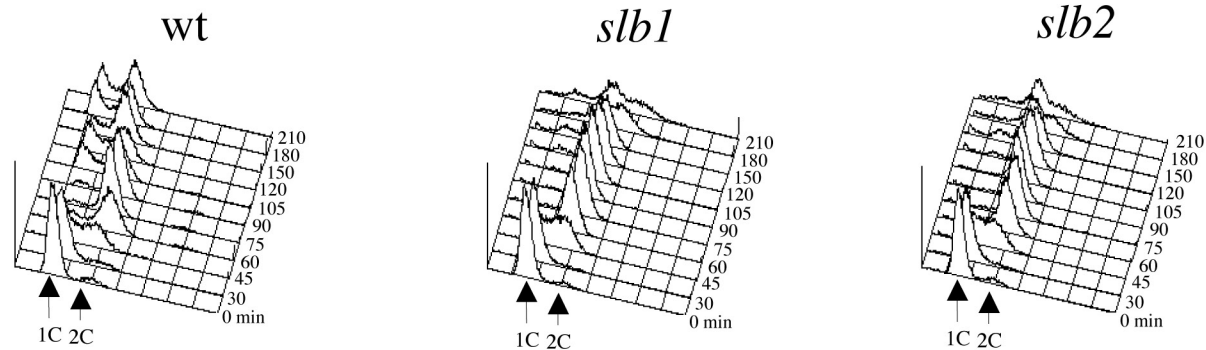**B**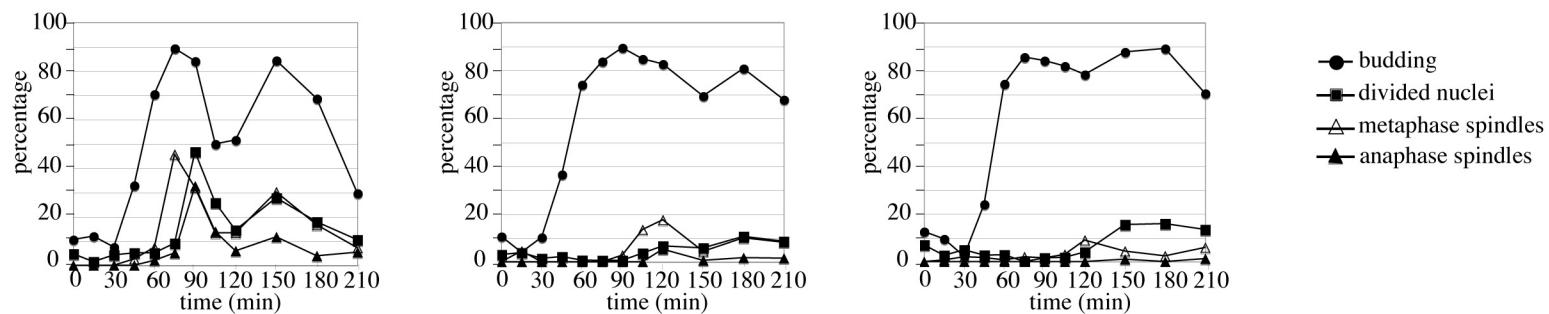**C**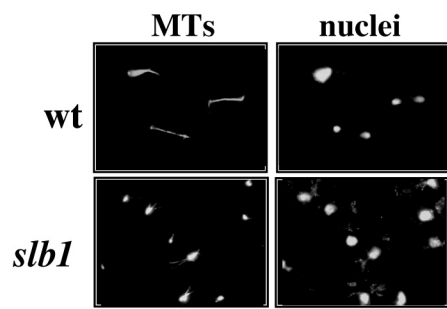

*stu1-5*

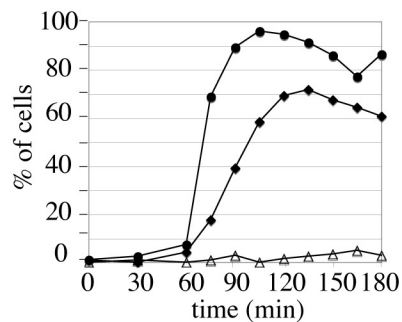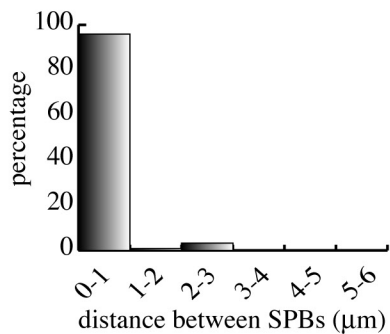

*stu1-5 mad2Δ*

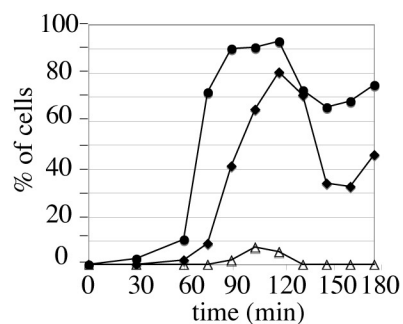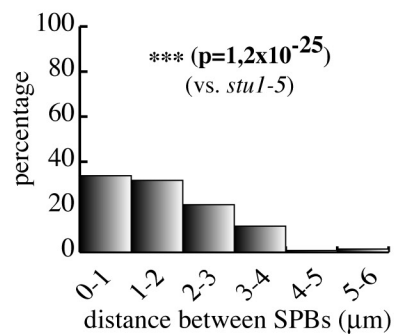

*stu1-5 mad2Δ GAL1-CLB2Δdb*

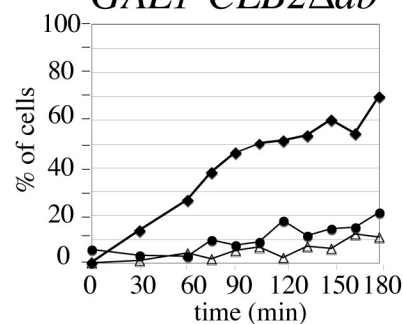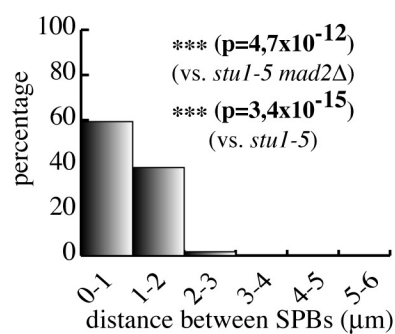

● budding  
◆ separated SPBs  
△ bipolar spindles

**Supplementary Table I. Strains used in this study**

| <b>Name</b> | <b>Relevant genotype</b>                                                            |
|-------------|-------------------------------------------------------------------------------------|
| ySP1804     | <i>MATa, stu1-5, spc42AI::LEU2, TRP1::SPC42-GFP (3X)</i>                            |
| ySP1856     | <i>MATa, stu1-5, spc42AI::LEU2, TRP1::SPC42-GFP (3X), mad2::TRP1</i>                |
| ySP4383     | <i>MATa, slb1</i>                                                                   |
| ySP4419     | <i>MATa, slb2</i>                                                                   |
| ySP4595     | <i>MATa, stu1-5, spc42AI::LEU2, TRP1::SPC42-GFP (3X), mad3::TRP1 (Kl. lactis)</i>   |
| ySP4935     | <i>MATa, TRP1::SPC42-GFP</i>                                                        |
| ySP5360     | <i>MATa, bub3::bub3WDdl::URA3, TRP1::SPC42-GFP, cin8-3, kip1::HIS3</i>              |
| ySP5361     | <i>MATa, TRP1::SPC42-GFP, cin8-3, kip1::HIS3</i>                                    |
| ySP5363     | <i>MATa, cin8-3, kip1::HIS3, TRP1::SPC42-GFP, mad3::TRP1</i>                        |
| ySP5364     | <i>MATa, cin8-3, kip1::HIS3, TRP1::SPC42-GFP, mad2::TRP1</i>                        |
| ySP5366     | <i>MATa, cin8-3, kip1::HIS3, TRP1::SPC42-GFP, CDC20-107 on YCplac33</i>             |
| ySP6194     | <i>MATa, stu1-5, spc42AI::LEU2, TRP1::SPC42-GFP (3X), CDC20-107 on YCplac33</i>     |
| ySP6202     | <i>MATa, stu1-5, spc42AI::LEU2, TRP1::SPC42-GFP (3X), bub3::bub3WDdl::URA3</i>      |
| ySP6204     | <i>MATa, stu1-5, TRP1::SPC42-GFP (3X), bub3::bub3WDdl::URA</i>                      |
| ySP6583     | <i>MATa, stu1-5, TRP1::SPC42-GFP (3X), mad2::TRP1, cdc14-3</i>                      |
| ySP6605     | <i>MATa, stu1-5, TRP1::SPC42-GFP (3X), mad2::TRP1, dyn1::URA3</i>                   |
| ySP6625     | <i>MATa, stu1-5, TRP1::SPC42-GFP (3X), mad2::TRP1</i>                               |
| ySP6665     | <i>MATa, stu1-5, TRP1::SPC42-GFP (3X), mad2::TRP1, cdc20-3</i>                      |
| ySP6789     | <i>MATa, stu1-5, TRP1::SPC42-GFP, mad3::TRP1 (Kl. lactis), cdc20-3</i>              |
| ySP6891     | <i>MATa, stu1-5, TRP1::SPC42-GFP, mad3::TRP1 (Kl. lactis)</i>                       |
| ySP6892     | <i>MATa, stu1-5, TRP1::SPC42-GFP (3X)</i>                                           |
| ySP7068     | <i>MATa, stu1-5, TRP1::SPC42-GFP (3X), pds1::URA3</i>                               |
| ySP7211     | <i>MATa, stu1-5, TRP1::SPC42-GFP (3X), mad2::TRP1, cdc16-1</i>                      |
| ySP7469     | <i>MATa, bub3::bub3WDdl::URA3, stu1-5, cdc5 (msd2-1::URA3), TRP1::SPC42-GFP</i>     |
| ySP7572     | <i>MATa, stu1-5, TRP1::SPC42-GFP (3X), mad2::TRP1, leu2::LEU2 GAL-PDS1mdb-myc18</i> |

ySP7653 *MATa, stu1-5, TRP1::SPC42-GFP (3X), mad2::TRP1, ura3::GAL1-CLB $\Delta$ db::URA3*  
ySP7773 *MATa, cin8-3, kip1::HIS3, TRP1::SPC42-GFP, 3X GAL1-CDC14::URA3*  
ySP7926 *MATa, stu1-5, TRP1::SPC42-GFP (3X), mad2::TRP1, swe1::LEU2*  
ySP7981 *MATa, stu1-5, TRP1::SPC42-GFP (3X), mad2::TRP1, cdc14-1*  
ySP7828 *MATa, stu1-5, TRP1::SPC42-GFP (3X), mad2::TRP1, esp1-1*
